# Supplementary material for: Hydrogen gas inhalation therapy may not work sufficiently to mitigate oxidative stress induced with REBOA
Source: PubMed Central journal article supplement — Sci Rep. 2024 Dec 30;14:32128. doi: 10.1038/s41598-024-83934-y (PMC11686333; doi:10.1038/s41598-024-83934-y), 2024-12-30
Supplement: 41598_2024_83934_MOESM1_ESM.pdf [file 41598_2024_83934_MOESM1_ESM.pdf]

Supplement Figure 1.

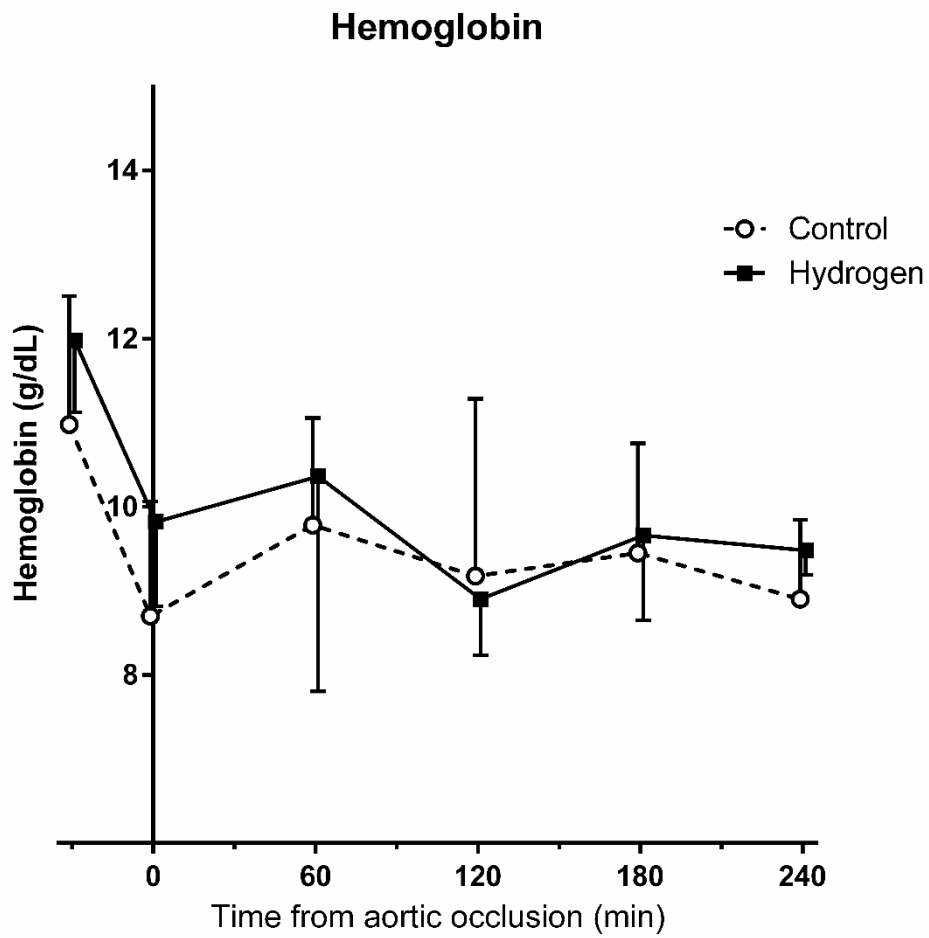

Changes in hemoglobin level before and after phlebotomy were 11.0 (1.5) to 8.7 (1.4) g/dL in the control group and 12.0 (0.86) to 9.8 (1.0) g/dL in the hydrogen group, respectively.
