# Supplementary material for: Hydrogen gas inhalation therapy may not work sufficiently to mitigate oxidative stress induced with REBOA
Source: PubMed Central journal article supplement — Sci Rep. 2024 Dec 30;14:32128. doi: 10.1038/s41598-024-83934-y (PMC11686333; doi:10.1038/s41598-024-83934-y), 2024-12-30
Supplement: 41598_2024_83934_MOESM2_ESM.pdf [file 41598_2024_83934_MOESM2_ESM.pdf]

Supplement Figure 2.

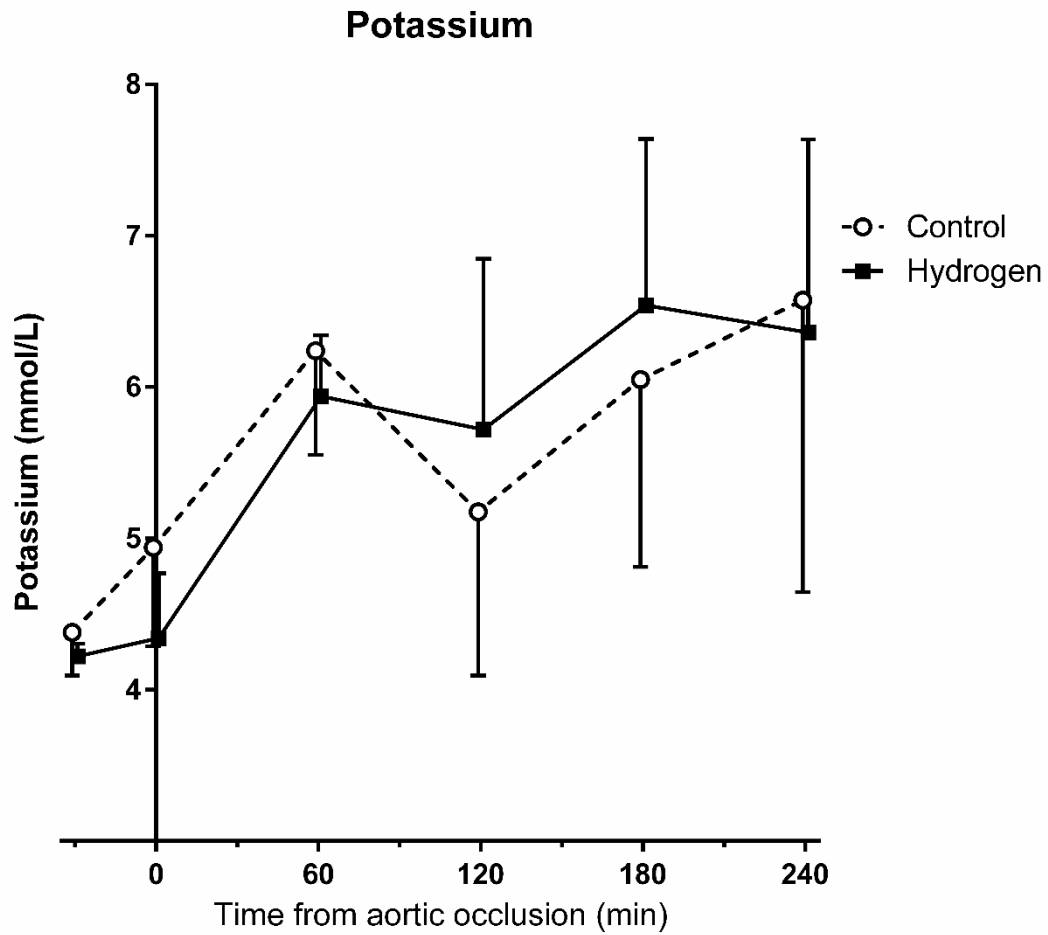

Changes in potassium levels before phlebotomy and T=240 were 4.4 (0.3) to 6.6 (1.9) mEq/L in the control group, and 4.2 (0.1) to 6.4 (1.3) g/dL in the hydrogen group, respectively.
