# Supplementary material for: Hydrogen gas inhalation therapy may not work sufficiently to mitigate oxidative stress induced with REBOA
Source: PubMed Central journal article supplement — Sci Rep. 2024 Dec 30;14:32128. doi: 10.1038/s41598-024-83934-y (PMC11686333; doi:10.1038/s41598-024-83934-y), 2024-12-30
Supplement: 41598_2024_83934_MOESM3_ESM.pdf [file 41598_2024_83934_MOESM3_ESM.pdf]

Supplement Figure 3.

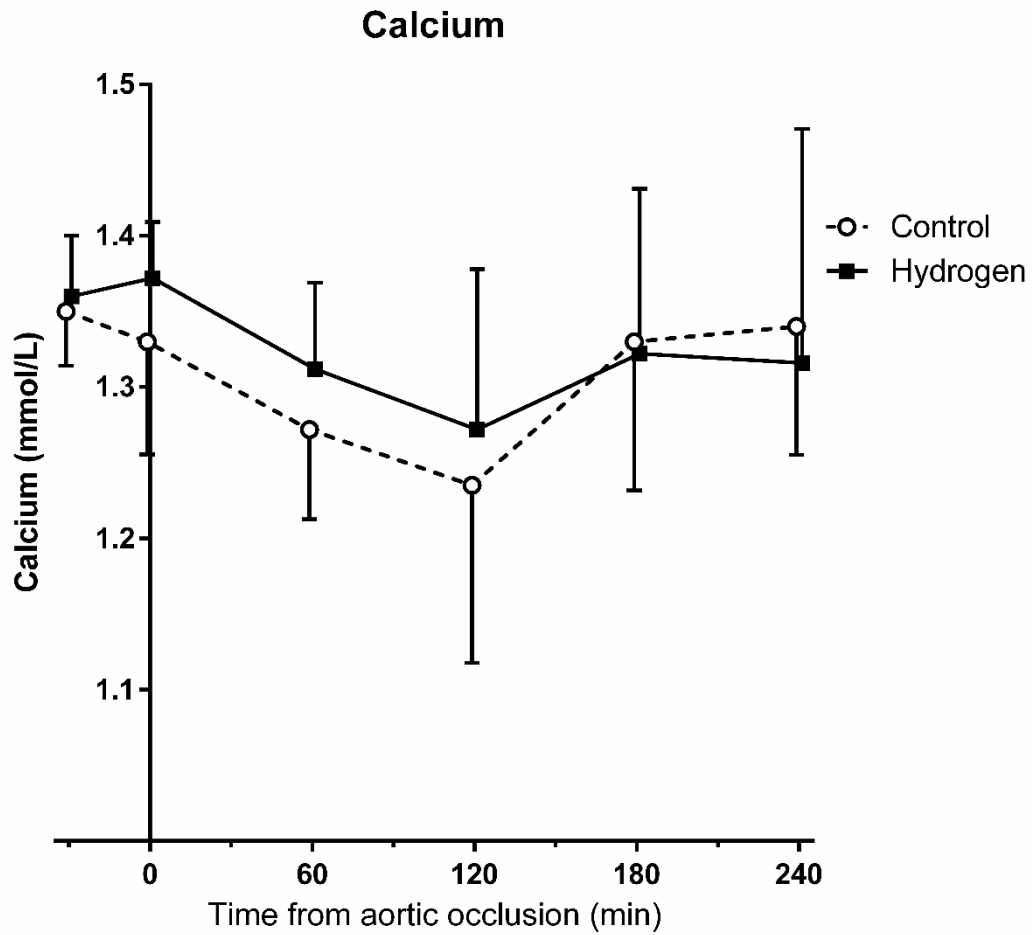

Changes in calcium levels before phlebotomy and T=240 were 1.35 (0.04) to 1.34 (0.08) mEq/L in the control group and 1.36 (0.04) to 1.32 (0.15) mEq/L in the hydrogen group, respectively.
