# Supplementary material for: Hydrogen gas inhalation therapy may not work sufficiently to mitigate oxidative stress induced with REBOA
Source: PubMed Central journal article supplement — Sci Rep. 2024 Dec 30;14:32128. doi: 10.1038/s41598-024-83934-y (PMC11686333; doi:10.1038/s41598-024-83934-y), 2024-12-30
Supplement: 41598_2024_83934_MOESM4_ESM.pdf [file 41598_2024_83934_MOESM4_ESM.pdf]

## Supplement Figure 4

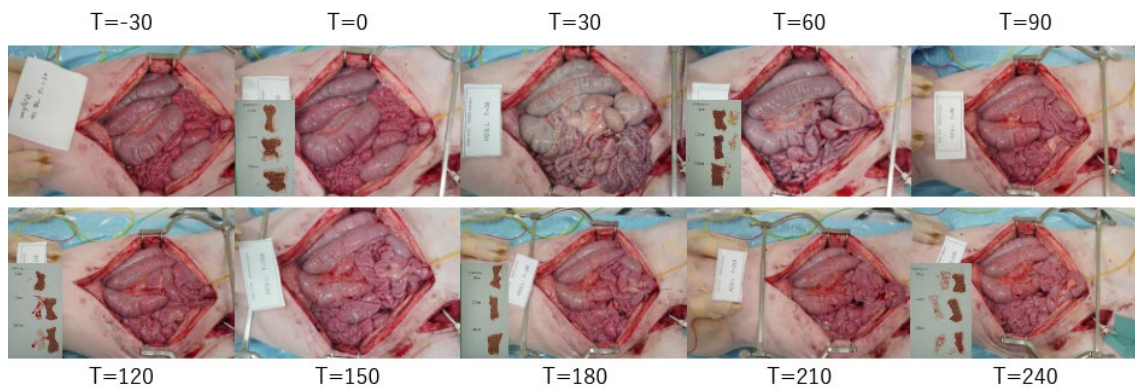

The gross abdomen findings became pale white during occlusion (T=30, T=60) and recovered after deflation (T=90 to T=240).
