# Supplementary material for: Hydrogen gas inhalation therapy may not work sufficiently to mitigate oxidative stress induced with REBOA
Source: PubMed Central journal article supplement — Sci Rep. 2024 Dec 30;14:32128. doi: 10.1038/s41598-024-83934-y (PMC11686333; doi:10.1038/s41598-024-83934-y), 2024-12-30
Supplement: 41598_2024_83934_MOESM7_ESM.pdf [file 41598_2024_83934_MOESM7_ESM.pdf]

Supplement Figure 7

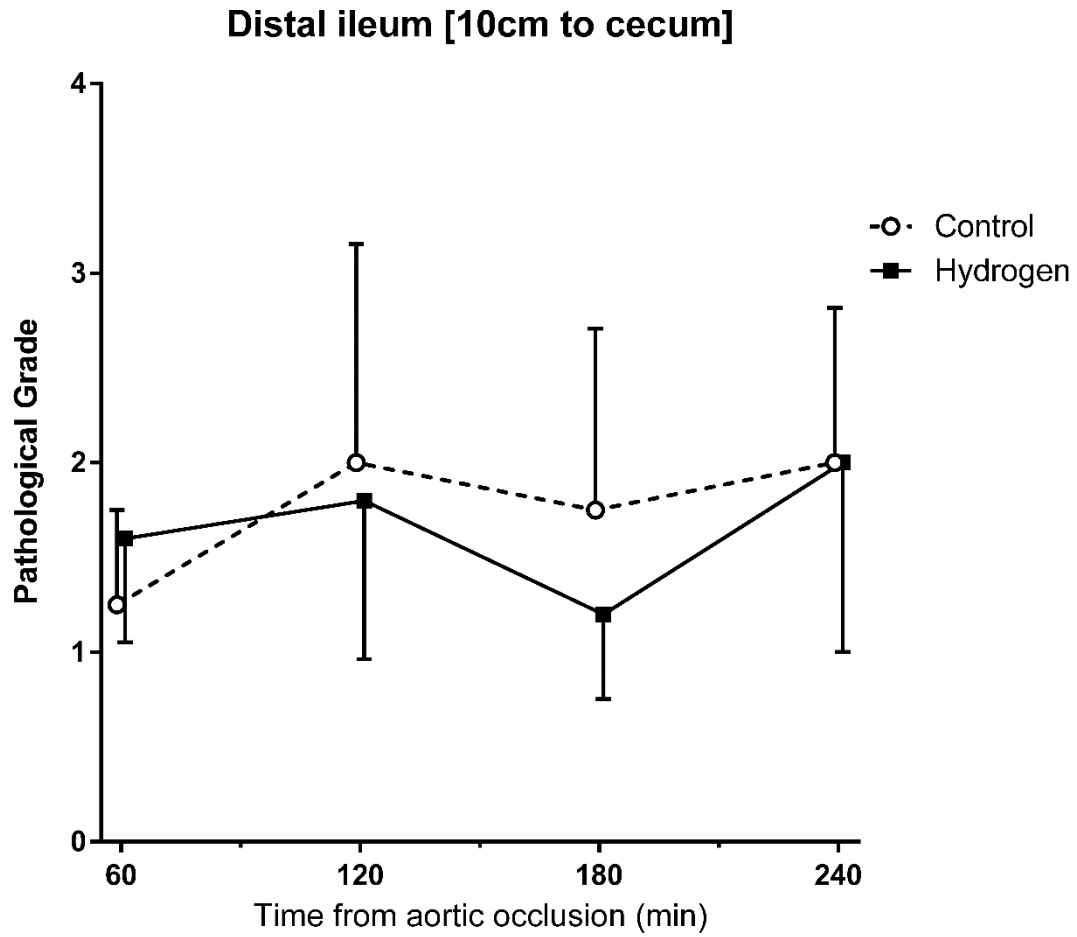

Changes in the pathological grade of the distal ileum tended to be similar. The mean (standard deviation) grades at T=240 were 2.0 (0.8) in the control group and 2.0 (1.0) in the hydrogen group, respectively.
