# Supplementary material for: Hydrogen gas inhalation therapy may not work sufficiently to mitigate oxidative stress induced with REBOA
Source: PubMed Central journal article supplement — Sci Rep. 2024 Dec 30;14:32128. doi: 10.1038/s41598-024-83934-y (PMC11686333; doi:10.1038/s41598-024-83934-y), 2024-12-30
Supplement: 41598_2024_83934_MOESM8_ESM.pdf [file 41598_2024_83934_MOESM8_ESM.pdf]

**Supplemental Table 1**

| Histopathology grade | Microscopic findings                                                                                                                                                                                                                                   |
|----------------------|--------------------------------------------------------------------------------------------------------------------------------------------------------------------------------------------------------------------------------------------------------|
| Grade 0              | Normal mucosa histology                                                                                                                                                                                                                                |
| Grade 1              | Small cytology alterations in the cell structure representation. Increased leucocytes presence and space widening between villosities                                                                                                                  |
| Grade 2              | Cell alterations with focused lesions and presence of some cell lysis. There are destructions of the villosities in at most 25% of their extension                                                                                                     |
| Grade 3              | Besides the cytology alterations, there are structural lesions in intermediate extension. Presence of dilated capillaries and higher quantity of inflamed cells. The destruction should be between 25% and 50% of the villosities extension            |
| Grade 4              | Structural destruction of the villosities, only traces of some villosities, formed by inflamed cells and necrotic material, with hemorrhage and basal glandular ulceration. The destruction should be between 50% and 75% of the villosities extension |
| Grade 5              | Destruction of all the mucosa, no glandular structure can be seen, only the amorphous material laying on the sub-mucosa tissue. The destruction should be between 75% and 100% of the villosities extension                                            |
